# Supplementary material
Source: PubMed Central journal article supplement (PMC11421977)
Supplement: NIHMS2012565-supplement-1.pdf [file NIHMS2012565-supplement-1.pdf]

Supplemental table 1. Sequences obtained as part of study imaging protocol (all sequences comprised a 3D sagittal acquisition of entire brain).

| Sequence                                                               | Isotropic Resolution (mm) | TR/TE    | Acquisition time | Other Parameters                     |
|------------------------------------------------------------------------|---------------------------|----------|------------------|--------------------------------------|
| Precontrast T2-weighted FLAIR                                          | 1.0                       | 4800/352 | 7 min 9s         | Inversion time (TI) = 1800 ms        |
| Pre- and postcontrast T2*-weighted segmented echo-planar imaging (EPI) | 0.65                      | 64/35    | 5 min 48 s       | Flip angle = 10°,<br>EPI factor = 15 |
| Pre- and postcontrast T1-weighted imaging                              | 1.0                       | 7.8/3.0  | 3 min 16 s       | Flip angle= 18°                      |

Supplemental table 2. Demographics and main characteristics of the entire CAVS-MS Pilot based on the availability of cerebrospinal fluid results.

| Variable                                              | n                         |                               | p-value            |
|-------------------------------------------------------|---------------------------|-------------------------------|--------------------|
|                                                       | Lumbar puncture performed | Lumbar puncture not performed |                    |
| Participants                                          | 53                        | 39                            |                    |
| Age (median years, Q1, Q3)                            | 43 [33, 52]               | 49 [38, 57]                   | 0.167 <sup>a</sup> |
| Sex (female)                                          | 37 (69.8%)                | 30 (76.9%)                    | 0.603 <sup>b</sup> |
| Race                                                  |                           |                               | 0.480 <sup>b</sup> |
| White                                                 | 43 (81.1%)                | 34 (87.2%)                    |                    |
| African American or Black                             | 3 (5.7%)                  | 4 (10.3%)                     |                    |
| American Indian or Alaska Native                      | 1 (1.9%)                  | 0 (0.0%)                      |                    |
| Asian                                                 | 2 (3.8%)                  | 1 (2.6%)                      |                    |
| Unknown                                               | 3 (5.7%)                  | 0 (0.0%)                      |                    |
| Latinx ethnicity                                      | 6 (11.3%)                 | 2 (5.1%)                      | 0.505 <sup>b</sup> |
| Weeks since first symptom onset (median, Q1, Q3)      | 66.14 [21.57, 275.00]     | 106.71 [14.11, 282.93]        | 0.461 <sup>a</sup> |
| Neurologic symptoms at the time of initial assessment | 49 (92.5%)                | 36 (92.3%)                    | 1.000 <sup>b</sup> |
| Typical syndrome at presentation                      | 11 (20.8%)                | 5 (12.8%)                     | 0.475 <sup>b</sup> |
| EDSS (median, Q1, Q3)                                 | 1.50 [1.00, 2.00]         | 1.00 [0.00, 2.00]             | 0.786 <sup>a</sup> |
| Dissemination in space by MRI                         | 41 (77.4)                 | 26 (66.7%)                    | 0.367 <sup>b</sup> |
| Dissemination in time by MRI                          | 20 (37.7%)                | 12 (30.8%)                    | 0.637 <sup>b</sup> |
| Dissemination in space and time by MRI                | 18 (34.0%)                | 11 (28.2%)                    | 0.719 <sup>b</sup> |

a – bootstrap median difference

b – chi-square or Fisher's exact test

Abbreviations: EDSS – Expanded Disability Status Scale; MRI – magnetic resonance imaging; Q1/3 – first/third quartile

Supplemental table 3. Presentations and final diagnoses of participants (n=53).

| Presentation                                                                | Number of participants                     |
|-----------------------------------------------------------------------------|--------------------------------------------|
| First-time neurologic symptoms evaluated for a clinical attack              | 38 (10 with typical syndrome presentation) |
| Two or more episodes of neurologic symptoms evaluated for a clinical attack | 11 (1 with typical syndrome presentation)  |
| White matter lesions on MRI brain                                           | 4                                          |
| Final diagnosis                                                             |                                            |
| Multiple sclerosis                                                          | 27                                         |
| Clinically isolated syndrome                                                | 5                                          |
| Small vessel ischemic disease                                               | 4                                          |
| Radiologically isolated syndrome                                            | 3                                          |
| Vitamin B12 deficiency                                                      | 2                                          |
| Migraine and post-concussive syndrome                                       | 2                                          |
| Migraine                                                                    | 1                                          |
| Fibromyalgia                                                                | 1                                          |
| Sleep apnea                                                                 | 1                                          |
| Paresthesia                                                                 | 1                                          |
| Small fiber neuropathy                                                      | 1                                          |
| Traumatic cervical myelopathy                                               | 1                                          |
| Systemic lupus erythematosus                                                | 1                                          |
| Cranial neuropathy                                                          | 1                                          |
| Thoracic myelitis                                                           | 1                                          |
| Non-specific white matter changes                                           | 1                                          |

Abbreviations: MRI – magnetic resonance imaging.

Supplemental table 4. Proportions of participants presenting after first-time neurologic symptoms evaluated for a clinical attack diagnosed with multiple sclerosis at initial assessment and at 12-month follow-up.

|                                    | n/total per variable                  |                                   |
|------------------------------------|---------------------------------------|-----------------------------------|
|                                    | MS diagnosis at initial visit (19/38) | MS diagnosis at 12 months (22/38) |
| OCB positive                       | 14/20 (70%)                           | 17/20 (85%)                       |
| Select-3 positive                  | 16/27 (59%)                           | 18/27 (67%)                       |
| Select-6 positive                  | 13/16 (81%)                           | 16/16 (100%)                      |
| OCB positive and Select-3 positive | 12/16 (75%)                           | 14/16 (88%)                       |
| OCB positive and Select-3 negative | 2/4 (50%)                             | 3/4 (75%)                         |
| OCB positive and Select-6 positive | 11/13 (85%)                           | 13/13 (100%)                      |
| OCB positive and Select-6 negative | 3/7 (43%)                             | 4/7 (57%)                         |
| Select-6 positive and MRI DIS      | 13/15 (87%)                           | 15/15 (100%)                      |
| OCB positive and MRI DIS           | 13/18 (72%)                           | 16/18 (89%)                       |

Abbreviations: MRI DIS – dissemination in space on magnetic resonance imaging (according to McDonald 2017 criteria); MS – multiple sclerosis; OCB – serum-unmatched oligoclonal bands in the cerebrospinal fluid

Supplemental table 5. Sensitivity, specificity, positive and negative predictive values of Select-3, Select-6, oligoclonal bands, or combinations for diagnosis of MS in participants presenting after first-time neurologic symptoms evaluated for a clinical attack..

|                                                       | Sensitivity       | Specificity       | PPV               | NPV               |
|-------------------------------------------------------|-------------------|-------------------|-------------------|-------------------|
| Diagnosis of multiple sclerosis at initial assessment |                   |                   |                   |                   |
| OCB                                                   | 0.74 (0.49, 0.91) | 0.68 (0.43, 0.87) | 0.70 (0.46, 0.88) | 0.72 (0.47, 0.90) |
| Select-3                                              | 0.84 (0.60, 0.97) | 0.42 (0.20, 0.67) | 0.59 (0.39, 0.78) | 0.73 (0.39, 0.94) |
| Select-6                                              | 0.68 (0.43, 0.87) | 0.84 (0.60, 0.97) | 0.81 (0.54, 0.96) | 0.73 (0.50, 0.89) |
| Select-3 + OCB                                        | 0.63 (0.38, 0.84) | 0.79 (0.54, 0.94) | 0.75 (0.48, 0.93) | 0.68 (0.45, 0.86) |
| Select-6 + OCB                                        | 0.58 (0.33, 0.80) | 0.89 (0.67, 0.99) | 0.85 (0.55, 0.98) | 0.68 (0.46, 0.85) |
| Select-6 + MRI DIS                                    | 0.68 (0.43, 0.87) | 0.89 (0.67, 0.99) | 0.87 (0.60, 0.98) | 0.74 (0.52, 0.90) |
| OCB + MRI DIS                                         | 0.68 (0.43, 0.87) | 0.74 (0.49, 0.91) | 0.72 (0.47, 0.90) | 0.70 (0.46, 0.88) |
| p-values                                              |                   |                   |                   |                   |
| OCB vs Select-3                                       | 0.157             | 0.025             | 0.086             | 0.952             |
| OCB vs Select-6                                       | 0.317             | 0.083             | 0.117             | 0.910             |
| Select-3 vs Select-6                                  | 0.083             | 0.005             | 0.014             | 1.000             |
| Select-3 + OCB vs Select-3                            | 0.046             | 0.008             | 0.055             | 0.639             |
| Select-6 + OCB vs Select-6                            | 0.157             | 0.317             | 0.556             | 0.275             |
| Select-3 + OCB vs Select-6 + OCB                      | 0.317             | 0.157             | 0.207             | 0.958             |
| Select-6 + MRI DIS vs OCB + MRI DIS                   | -                 | 0.083             | 0.062             | 0.116             |
| Diagnosis of multiple sclerosis at 12-month follow-up |                   |                   |                   |                   |
| OCB                                                   | 0.77 (0.55, 0.92) | 0.81 (0.54, 0.96) | 0.85 (0.62, 0.97) | 0.72 (0.47, 0.90) |
| Select-3                                              | 0.82 (0.60, 0.95) | 0.44 (0.20, 0.70) | 0.67 (0.46, 0.83) | 0.64 (0.31, 0.89) |
| Select-6                                              | 0.73 (0.50, 0.89) | 1.00 (0.79, 1.00) | 1.00 (0.79, 1.00) | 0.73 (0.50, 0.89) |
| Select-3 + OCB                                        | 0.64 (0.41, 0.83) | 0.88 (0.62, 0.98) | 0.88 (0.62, 0.98) | 0.64 (0.41, 0.83) |
| Select-6 + OCB                                        | 0.59 (0.36, 0.79) | 1.00 (0.79, 1.00) | 1.00 (0.75, 1.00) | 0.64 (0.43, 0.82) |
| Select-6 + MRI DIS                                    | 0.68 (0.45, 0.86) | 1.00 (0.79, 1.00) | 1.00 (0.78, 1.00) | 0.70 (0.47, 0.87) |
| OCB + MRI DIS                                         | 0.73 (0.50, 0.89) | 0.88 (0.62, 0.98) | 0.89 (0.65, 0.99) | 0.70 (0.46, 0.88) |
| p-values                                              |                   |                   |                   |                   |
| OCB vs Select-3                                       | 0.317             | 0.014             | 0.019             | 0.337             |
| OCB vs Select-6                                       | 0.317             | 0.083             | 0.084             | 0.910             |
| Select-3 vs Select-6                                  | 0.157             | 0.003             | 0.003             | 0.384             |
| Select-3 + OCB vs Select-3                            | 0.046             | 0.008             | 0.020             | 1.000             |
| Select-6 + OCB vs Select-6                            | 0.083             | 1.000             | 1.000             | 0.083             |
| Select-3 + OCB vs Select-6 + OCB                      | 0.317             | 0.157             | 0.158             | 0.917             |
| Select-6 + MRI DIS vs OCB + MRI DIS                   | 0.317             | 0.157             | 0.133             | 0.909             |

Abbreviations: MRI DIS – dissemination in space on magnetic resonance imaging (according to McDonald 2017 criteria); NPV – negative predictive value; OCB – serum-unmatched oligoclonal bands in cerebrospinal fluid; PPV – positive predictive value. Estimates provided as proportions with 95% confidence intervals.
